# Supplementary material for: High-resolution physical–biogeochemical structure of a filament and an eddy of upwelled water off northwest Africa
Source: Copernicus journal article supplement (doi:10.5194/os-16-253-2020), 2020-02-28
Supplement: Supplementary file 1 [file os-16-253-2020-supplement.zip]

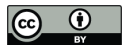

## *Supplement of*

# **High-resolution physical–biogeochemical structure of a filament and an eddy of upwelled water off northwest Africa**

**Wilken-Jon von Appen et al.**

*Correspondence to:* Wilken-Jon von Appen ([wilken-jon.von.appen@awi.de](mailto:wilken-jon.von.appen@awi.de))

- [os-16-253-2020-supplement-title-page.pdf](#)
- [SSH\\_animated.pdf](#)
- [table\\_suppl\\_material.xlsx](#)
- [table\\_suppl\\_material\\_WaMoS.xlsx](#)

The copyright of individual parts of the supplement might differ from the CC BY 4.0 License.
