# Supplementary material for: High-resolution physical–biogeochemical structure of a filament and an eddy of upwelled water off northwest Africa
Source: Copernicus journal article supplement (doi:10.5194/os-16-253-2020), 2020-02-28
Supplement: Supplementary file 1 [file table_suppl_material.xlsx]

## Sheet: Sheet1
Depth	Latitude	Longitude	Phosphate	Silicate	Nitrate	POC	Tot Chl-a	Hapto-phytes	Diatoms	Dinoflagell-lates	Cyano noProchl	Chloro-phytes	Chryso-phytes	Prochloro- coccus
m	°N	°E	µmol/l	µmol/l	µmol/l	µg/l	µg/l	µg/l	µg/l	µg/l	µg/l	µg/l	µg/l	µg/l
11	19.804	-21.1525	0.16	0.93	0.37	151.413	0.621	0.181778	0.0801376	0.100896	0.145023	0.087884	0.0255746	0
11	20.0828	-21.0909	0.2	1.03	1.21	128.522	0.59	0.198168	0.0262427	0.0851554	0.156743	0.0951443	0.028249	0
11	20.4583	-21.0187	0.1	1.13	0.64	157.925	0.689	0.219198	0.13384	0.0563188	0.19005	0.0669562	0.0227461	0
11	20.8343	-20.9463	0.28	2.16	3.89	299.061	1.157	0.220351	0.293473	0.123071	0.365182	0.1351	0.0199903	0
11	21.2234	-20.8709	0.12	1.13	0.07	197.714	0.341	0.122672	0.0296346	0.0558999	0.051743	0.0430981	0.0286773	0.00970789
11	21.589	-20.7788	0.08	1.07	0.01	45.4302	0.22	0.0996578	0.00217422	0.0357866	0.0292194	0.0279359	0.0209469	0.00453529
11	21.9533	-20.6866	0.09	1.1	0.12	62.0215	0.437	0.191392	0.00952041	0.0474523	0.0779324	0.0627064	0.0372975	0.0108464
11	22.3164	-20.5946	0.04	1.09	0.01	128.364	0.441	0.12221	0.0369327	0.0443875	0.136934	0.0595971	0.018978	0.0224161
11	22.6123	-20.546	0.055	1.1	0.005	133.357	0.417	0.0854629	0.0126513	0.0477624	0.174824	0.0406931	0.0137549	0.0419458
0-30	21.6131	-20.7727					0.216391	0.0923624	0.00214979	0.0471404	0.0295848	0.0200707	0.0205463	0.00453683
0-30	21.6309	-20.7685					0.624602	0.256639	0.0184429	0.0237986	0.183974	0.0604007	0.0573303	0.0240159
0-30	21.6358	-20.7672					0.23692	0.0698168	0.0128061	0.0258113	0.0560417	0.0239824	0.0193113	0.0291506
0-30	21.6538	-20.7625					0.156795	0.0735351	0.0259259	0.0279816	0.00170174	0.0181793	0.00847089	0.001
0-30	21.6589	-20.7612					0.252368	0.0794931	0.0109222	0.0250046	0.0794102	0.0328497	0.0127965	0.0118917
0-30	21.6764	-20.7567					0.205828	0.027884	0.00218693	0.0182416	0.0155131	0.0169657	0.00205238	0.122985
0-30	21.6814	-20.7556					0.363793	0.0547137	0.00606876	0.0305515	0.0741226	0.0239695	0.00782967	0.166537
0-30	21.6992	-20.751					0.267237	0.0328094	0.00683284	0.0229509	0.0210041	0.0164267	0.0030106	0.164203
0-30	21.7041	-20.7499					0.201093	0.061199	0.00975869	0.0262057	0.0225928	0.0263607	0.0075078	0.047468
0-30	21.7203	-20.7456					0.353186	0.0845354	0.02858	0.0246728	0.156101	0.0299842	0.0200842	0.00922821
0-30	21.7253	-20.7442					0.211758	0.0564955	0.0148602	0.0282008	0.0547134	0.0201009	0.0079881	0.029399
0-30	21.7432	-20.7398					0.781382	0.142916	0.0119559	0.0184405	0.417336	0.0458194	0.0437816	0.101132
0-30	21.7482	-20.7385					0.243618	0.0575863	0.0110106	0.0227515	0.0359862	0.0247866	0.00638511	0.0851112
0-30	21.7667	-20.7341					0.302507	0.0736039	0.00981621	0.0338217	0.0472454	0.0311846	0.0127186	0.0941167
0-30	21.7716	-20.7326					0.246525	0.0381338	0.00971176	0.0287401	0.0461356	0.0201961	0.00636157	0.0972457
0-30	21.7885	-20.7285					0.137249	0.0452244	0.00760236	0.0289924	0.0212135	0.0203768	0.00587745	0.00796201
0-30	21.7938	-20.7269					0.299485	0.0735367	0.0130377	0.028494	0.0680578	0.0291985	0.0143853	0.0727751
0-30	21.8107	-20.7229					0.61035	0.317398	0.0171918	0.0304121	0.0618997	0.0926771	0.0574886	0.0332819
0-30	21.8155	-20.7216					0.242874	0.0712743	0.0118477	0.0306032	0.0453733	0.0299382	0.0113659	0.0424713
0-30	21.8321	-20.7173					0.184527	0.0404442	0.0145435	0.0324438	0.0356095	0.0207295	0.00693078	0.0338257
0-30	21.8369	-20.7163					0.303237	0.0893135	0.00902468	0.0340966	0.0865348	0.036792	0.0180546	0.0294208
0-30	21.8543	-20.7118					0.342529	0.0790083	0.02231	0.0415513	0.104439	0.0324733	0.0201839	0.0425627
0-30	21.8592	-20.7105					0.280952	0.077099	0.0171202	0.0336501	0.0408144	0.0347743	0.00991674	0.0675774
0-30	21.8771	-20.7062					0.283307	0.0441841	0.0089536	0.0371453	0.110639	0.022302	0.0103816	0.0497019
0-30	21.882	-20.7049					0.282507	0.0588732	0.0115737	0.0377061	0.063622	0.0283389	0.00911232	0.0732806
0-30	21.8986	-20.7005					0.220459	0.0351869	0.00915014	0.0293755	0.0894247	0.0205646	0.00648461	0.0302721
0-30	21.9035	-20.6991					0.262237	0.0854245	0.0255601	0.0462369	0.0313787	0.039136	0.0143656	0.0201353
0-30	21.9207	-20.6949					0.295968	0.118642	0.0161414	0.0504096	0.0383078	0.0486055	0.0163575	0.00750476
0-30	21.9255	-20.6936					0.410641	0.13057	0.0254216	0.0557527	0.0724134	0.0538882	0.0194649	0.0531303
0-30	21.9429	-20.6894					0.516936	0.2261	0.0253639	0.0493257	0.0896982	0.0869705	0.0288036	0.0106746
0-30	21.9479	-20.6881					0.280286	0.079144	0.0203752	0.04407	0.0696102	0.0357577	0.0200977	0.0112316
0-30	21.9648	-20.6839					0.477681	0.0892637	0.0206691	0.0520726	0.0556725	0.0366248	0.0107794	0.212599
0-30	21.9697	-20.6826					0.421279	0.160047	0.0357971	0.0579523	0.0319439	0.0703741	0.0257314	0.0394327
0-30	21.9864	-20.6782					0.295984	0.10931	0.0186643	0.0487321	0.0178185	0.0540446	0.010848	0.0365663
0-30	21.9912	-20.6771					0.304673	0.0572195	0.0208656	0.0506885	0.0527802	0.0311711	0.00672355	0.0852249
0-30	22.0081	-20.6728					0.34056	0.109466	0.0359547	0.066421	0.0209977	0.0511349	0.0119394	0.044646
0-30	22.0128	-20.6716					0.358059	0.12789	0.0245898	0.062371	0.036776	0.052296	0.015328	0.0388084
0-30	22.0299	-20.6674					0.39584	0.124896	0.0353775	0.0697541	0.0352385	0.0587881	0.0149584	0.0568273
0-30	22.0346	-20.6661					0.429561	0.134059	0.027322	0.0739937	0.0882208	0.0580491	0.0251886	0.0227283
0-30	22.0523	-20.6617					0.297735	0.0549611	0.0261269	0.0658683	0.0601806	0.0351445	0.0121648	0.0432892
0-30	22.057	-20.6604					0.534812	0.195006	0.0373016	0.0734282	0.0664154	0.0844575	0.0275198	0.0506835
0-30	22.0743	-20.656					0.617149	0.063775	0.116858	0.0571099	0.149635	0.0459423	0.0101319	0.173696
0-30	22.079	-20.6547					0.545397	0.161515	0.0558658	0.0828945	0.104488	0.0807425	0.0443081	0.0155829
0-30	22.0956	-20.6508					0.399899	0.111432	0.0426041	0.0943347	0.047826	0.0533843	0.0170334	0.0332845
0-30	22.1003	-20.6495					0.702273	0.348151	0.0597022	0.0934275	0.0227461	0.146672	0.0278304	0.0037444
0-30	22.1163	-20.6454					0.29742	0.0790862	0.0343044	0.0903031	0.0356566	0.0408685	0.00560314	0.011598
0-30	22.121	-20.6443					0.590679	0.178381	0.0492648	0.0832819	0.16118	0.0716325	0.0251798	0.0217595
0-30	22.1389	-20.6397					0.554834	0.280701	0.0217416	0.118172	0.01355	0.094152	0.0153234	0.0111942
0-30	22.1436	-20.6387					0.654109	0.178409	0.023762	0.0899967	0.216517	0.0668534	0.0290526	0.0495184
0-30	22.1613	-20.6342					0.398515	0.141497	0.0340323	0.0743257	0.0408943	0.0582119	0.0130788	0.0364748
0-30	22.1659	-20.6329					0.371261	0.129443	0.0254884	0.0605221	0.0515758	0.0552353	0.0153372	0.0336597
0-30	22.1828	-20.6285					0.177572	0.049842	0.015686	0.0490397	0.0117437	0.0265221	0.00565132	0.0190869
0-30	22.1876	-20.6273					0.204836	0.0669948	0.0182016	0.0371708	0.0155333	0.0326219	0.00833666	0.0259768
0-30	22.2051	-20.6229					0.232554	0.0839772	0.0137041	0.0425388	0.00469331	0.0574885	0.00456549	0.0255869
0-30	22.228	-20.6171					0.340309	0.124724	0.0393307	0.0765394	0.0184519	0.0629974	0.0141767	0.00408893
0-30	22.2504	-20.6115					0.479789	0.119763	0.0477696	0.0732038	0.0705865	0.0545884	0.0157642	0.0981134
0-30	22.2728	-20.6057					0.459292	0.195185	0.048018	0.0717128	0.0251844	0.0866245	0.026197	0.0063704
0-30	22.2959	-20.5998					0.393729	0.0851527	0.0529489	0.0661746	0.0532	0.0475914	0.00855969	0.0801018
0-30	22.3192	-20.5939					0.395414	0.08172	0.0344805	0.0651031	0.125681	0.0528633	0.0145256	0.0210401
0-30	22.343	-20.5879					0.360082	0.129086	0.0498128	0.0878961	0.0139946	0.0618087	0.0103012	0.00718244
0-30	22.3659	-20.582					0.429905	0.0488406	0.0773304	0.0870157	0.126983	0.0274056	0.00528347	0.0570465
0-30	22.3894	-20.5761					0.620954	0.291587	0.0402283	0.11159	0.0459708	0.101889	0.0263088	0.0033808
