# Supplementary material for: High-resolution physical–biogeochemical structure of a filament and an eddy of upwelled water off northwest Africa
Source: Copernicus journal article supplement (doi:10.5194/os-16-253-2020), 2020-02-28
Supplement: Supplementary file 2 [file os-16-253-2020-supplement.zip]

Archive with 4 entries (4 files):
- table_suppl_material_WaMoS.xlsx
- SSH_animated.pdf
- os-16-253-2020-supplement-title-page.pdf
- table_suppl_material.xlsx
