# Supplementary material for: High-resolution physical–biogeochemical structure of a filament and an eddy of upwelled water off northwest Africa
Source: Copernicus journal article supplement (doi:10.5194/os-16-253-2020), 2020-02-28
Supplement: Supplementary file 2 [file os-16-253-2020-supplement.zip › SSH_animated.pdf]

# SSH over preceeding 2.5 months

High-resolution  
physical-  
biogeochemical  
structure

Wilken-Jon  
von Appen
