# Supplementary material for: High-resolution physical–biogeochemical structure of a filament and an eddy of upwelled water off northwest Africa
Source: Copernicus journal article supplement (doi:10.5194/os-16-253-2020), 2020-02-28
Supplement: Supplementary file 2 [file table_suppl_material_WaMoS.xlsx]

## Sheet: Sheet1
yyyy	mm	dd	HH	MM	SS	latitude	longitude	u [m/s]	v [m/s]
2018	5	30	18	26	37	19.9025	-21.1254	-0.031	-0.126
2018	5	30	18	29	11	19.9078	-21.1245	-0.031	-0.115
2018	5	30	18	31	46	19.913	-21.1237	-0.035	-0.102
2018	5	30	18	34	21	19.9182	-21.1228	-0.034	-0.09
2018	5	30	18	36	56	19.9231	-21.1216	-0.035	-0.075
2018	5	30	18	39	30	19.9282	-21.1205	-0.037	-0.062
2018	5	30	18	42	5	19.9335	-21.1196	-0.041	-0.049
2018	5	30	18	44	40	19.9387	-21.1186	-0.046	-0.036
2018	5	30	18	47	14	19.9439	-21.1177	-0.052	-0.025
2018	5	30	18	49	49	19.9491	-21.1165	-0.056	-0.012
2018	5	30	18	52	24	19.9543	-21.1157	-0.062	0
2018	5	30	18	54	58	19.9592	-21.1147	-0.064	0.008
2018	5	30	18	57	33	19.9642	-21.1133	-0.067	0.01
2018	5	30	19	0	8	19.9695	-21.1128	-0.069	0.013
2018	5	30	19	2	43	19.9747	-21.1118	-0.067	0.013
2018	5	30	19	5	17	19.9798	-21.1106	-0.061	0.012
2018	5	30	19	7	52	19.9847	-21.1096	-0.056	0.01
2018	5	30	19	10	27	19.9896	-21.1086	-0.05	0.006
2018	5	30	19	13	1	19.9947	-21.1077	-0.038	0.002
2018	5	30	19	15	36	19.9998	-21.1071	-0.033	0.003
2018	5	30	19	18	11	20.0048	-21.1059	-0.023	0.005
2018	5	30	19	20	45	20.0098	-21.1048	-0.013	0.005
2018	5	30	19	23	20	20.0146	-21.104	-0.009	0.003
2018	5	30	19	25	55	20.0195	-21.1031	-0.006	0
2018	5	30	19	28	29	20.0244	-21.1022	-0.003	-0.002
2018	5	30	19	31	4	20.0291	-21.1013	-0.005	-0.01
2018	5	30	19	33	39	20.0338	-21.1003	-0.008	-0.017
2018	5	30	19	36	14	20.0387	-21.0992	-0.012	-0.026
2018	5	30	19	38	48	20.0435	-21.0985	-0.019	-0.033
2018	5	30	19	41	23	20.0483	-21.0976	-0.026	-0.04
2018	5	30	19	43	58	20.0529	-21.0966	-0.029	-0.048
2018	5	30	19	46	32	20.0576	-21.0958	-0.039	-0.054
2018	5	30	19	49	7	20.0621	-21.095	-0.041	-0.06
2018	5	30	19	54	13	20.0719	-21.0931	-0.05	-0.063
2018	5	30	19	56	47	20.0768	-21.0921	-0.046	-0.066
2018	5	30	19	59	21	20.0819	-21.091	-0.046	-0.07
2018	5	30	20	1	56	20.0868	-21.0902	-0.041	-0.074
2018	5	30	20	4	30	20.0919	-21.0891	-0.038	-0.078
2018	5	30	20	7	3	20.097	-21.0881	-0.026	-0.085
2018	5	30	20	12	10	20.1068	-21.0864	-0.024	-0.09
2018	5	30	20	14	44	20.1114	-21.0854	-0.014	-0.102
2018	5	30	20	17	18	20.1163	-21.0845	-0.013	-0.113
2018	5	30	20	24	58	20.1316	-21.0815	-0.006	-0.129
2018	5	30	20	27	32	20.1367	-21.0805	-0.009	-0.125
2018	5	30	20	30	7	20.1418	-21.0794	-0.009	-0.123
2018	5	30	20	37	46	20.1579	-21.0766	-0.014	-0.09
2018	5	30	20	40	20	20.1634	-21.0756	-0.018	-0.08
2018	5	30	20	42	55	20.1684	-21.0744	-0.02	-0.068
2018	5	30	20	45	27	20.1736	-21.0735	-0.024	-0.051
2018	5	30	20	48	1	20.1788	-21.0726	-0.03	-0.032
2018	5	30	20	50	35	20.184	-21.0714	-0.031	-0.01
2018	5	30	20	53	9	20.1895	-21.0705	-0.026	-0.001
2018	5	30	21	0	48	20.2057	-21.0672	-0.019	0.029
2018	5	30	21	3	23	20.2111	-21.0663	-0.017	0.042
2018	5	30	21	5	57	20.2166	-21.0653	-0.009	0.063
2018	5	30	21	13	37	20.2328	-21.0621	0.002	0.099
2018	5	30	21	18	45	20.2438	-21.0601	0.01	0.095
2018	5	30	21	23	53	20.2547	-21.0578	0.031	0.095
2018	5	30	21	29	0	20.2653	-21.0557	0.046	0.07
2018	5	30	21	31	35	20.2708	-21.0547	0.055	0.058
2018	5	30	21	39	14	20.2867	-21.0515	0.092	0.033
2018	5	30	21	41	48	20.2922	-21.0507	0.104	0.037
2018	5	30	21	44	22	20.2972	-21.0497	0.126	0.036
2018	5	30	21	49	30	20.3075	-21.0478	0.144	0.059
2018	5	30	21	52	3	20.3129	-21.0468	0.153	0.083
2018	5	30	21	54	37	20.3183	-21.0456	0.15	0.091
2018	5	30	21	59	45	20.3292	-21.0437	0.146	0.114
2018	5	30	22	2	18	20.3346	-21.0423	0.131	0.134
2018	5	30	22	4	51	20.3403	-21.0416	0.109	0.147
2018	5	30	22	7	25	20.3457	-21.0404	0.095	0.146
2018	5	30	22	10	0	20.3511	-21.0394	0.071	0.144
2018	5	30	22	17	39	20.3671	-21.0363	0.04	0.144
2018	5	30	22	20	12	20.3724	-21.0354	0.022	0.134
2018	5	30	22	22	47	20.3778	-21.034	0.016	0.12
2018	5	30	22	25	21	20.3835	-21.0332	0.018	0.103
2018	5	30	22	27	55	20.3893	-21.0323	0.019	0.083
2018	5	30	22	33	1	20.4002	-21.0298	0.029	0.067
2018	5	30	22	35	36	20.4055	-21.0289	0.04	0.061
2018	5	30	22	38	10	20.4109	-21.0279	0.054	0.046
2018	5	30	22	40	43	20.416	-21.0267	0.068	0.029
2018	5	30	22	43	16	20.4213	-21.0257	0.081	0.014
2018	5	30	22	45	50	20.4268	-21.0249	0.088	0.011
2018	5	30	22	48	24	20.4319	-21.0239	0.104	0.01
2018	5	30	22	50	59	20.4368	-21.0227	0.111	0.011
2018	5	30	22	56	5	20.4466	-21.0209	0.123	0.008
2018	5	30	22	58	39	20.452	-21.0197	0.125	0.008
2018	5	30	23	1	13	20.4575	-21.0189	0.129	0.006
2018	5	30	23	3	47	20.4629	-21.018	0.13	0.003
2018	5	30	23	6	20	20.4681	-21.0169	0.142	-0.005
2018	5	30	23	11	27	20.4789	-21.0148	0.145	-0.019
2018	5	30	23	14	1	20.4842	-21.0136	0.148	-0.022
2018	5	30	23	16	36	20.4894	-21.0126	0.146	-0.029
2018	5	30	23	21	41	20.5004	-21.0104	0.145	-0.039
2018	5	30	23	24	15	20.5057	-21.0096	0.142	-0.038
2018	5	30	23	26	50	20.5111	-21.0087	0.132	-0.033
2018	5	30	23	31	56	20.5221	-21.0064	0.121	-0.025
2018	5	30	23	34	29	20.5276	-21.0054	0.104	-0.024
2018	5	30	23	37	3	20.5332	-21.0044	0.093	-0.019
2018	5	30	23	39	38	20.5386	-21.0034	0.087	-0.012
2018	5	30	23	42	11	20.5439	-21.0021	0.078	-0.004
2018	5	30	23	49	52	20.56	-20.9992	0.058	0.002
2018	5	30	23	52	26	20.5653	-20.9981	0.046	0.003
2018	5	30	23	54	59	20.5706	-20.9969	0.039	0.013
2018	5	30	23	57	32	20.5759	-20.9961	0.026	0.02
2018	5	31	0	0	7	20.5814	-20.9951	0.017	0.021
2018	5	31	0	2	42	20.5867	-20.9941	0.005	0.03
2018	5	31	0	5	15	20.5921	-20.9931	-0.002	0.041
2018	5	31	0	7	48	20.5975	-20.9917	-0.004	0.053
2018	5	31	0	10	21	20.603	-20.9907	-0.015	0.071
2018	5	31	0	15	30	20.6142	-20.9886	-0.031	0.096
2018	5	31	0	18	3	20.6198	-20.9875	-0.038	0.112
2018	5	31	0	23	10	20.6307	-20.9854	-0.06	0.131
2018	5	31	0	25	44	20.6364	-20.9845	-0.071	0.132
2018	5	31	0	28	18	20.6422	-20.9834	-0.091	0.129
2018	5	31	0	30	51	20.6475	-20.9822	-0.103	0.124
2018	5	31	0	35	59	20.6584	-20.98	-0.117	0.123
2018	5	31	0	41	5	20.6699	-20.9779	-0.141	0.124
2018	5	31	0	43	39	20.6758	-20.9769	-0.156	0.13
2018	5	31	0	46	13	20.6816	-20.9756	-0.17	0.133
2018	5	31	0	48	48	20.6874	-20.9745	-0.185	0.136
2018	5	31	0	51	21	20.6931	-20.9734	-0.197	0.136
2018	5	31	0	53	54	20.6988	-20.9721	-0.196	0.128
2018	5	31	0	56	27	20.7046	-20.9713	-0.202	0.116
2018	5	31	0	59	2	20.71	-20.9702	-0.192	0.107
2018	5	31	1	1	36	20.7153	-20.9693	-0.184	0.092
2018	5	31	1	4	9	20.7206	-20.9681	-0.172	0.074
2018	5	31	1	6	42	20.726	-20.967	-0.164	0.054
2018	5	31	1	9	16	20.7315	-20.9662	-0.154	0.032
2018	5	31	1	11	50	20.7366	-20.9652	-0.146	0.016
2018	5	31	1	14	25	20.742	-20.9639	-0.135	0.008
2018	5	31	1	19	31	20.7531	-20.962	-0.128	-0.006
2018	5	31	1	30	30	20.7716	-20.9585	-0.129	0.005
2018	5	31	1	38	12	20.788	-20.9552	-0.14	0.032
2018	5	31	1	40	45	20.7935	-20.9542	-0.149	0.069
2018	5	31	1	43	18	20.799	-20.9531	-0.147	0.084
2018	5	31	1	45	52	20.8045	-20.9518	-0.156	0.095
2018	5	31	1	48	27	20.8099	-20.9509	-0.166	0.103
2018	5	31	1	51	1	20.8152	-20.9498	-0.176	0.119
2018	5	31	1	56	6	20.8264	-20.9478	-0.186	0.124
2018	5	31	1	58	41	20.832	-20.9466	-0.196	0.132
2018	5	31	2	3	48	20.8435	-20.9446	-0.227	0.145
2018	5	31	2	6	21	20.8491	-20.9434	-0.237	0.146
2018	5	31	2	8	55	20.8547	-20.9422	-0.25	0.143
2018	5	31	2	11	30	20.8604	-20.9413	-0.262	0.144
2018	5	31	2	14	3	20.866	-20.94	-0.269	0.139
2018	5	31	2	16	36	20.8716	-20.9389	-0.275	0.129
2018	5	31	2	21	43	20.8828	-20.9369	-0.285	0.118
2018	5	31	2	24	18	20.8882	-20.9357	-0.288	0.1
2018	5	31	2	26	50	20.8936	-20.9347	-0.295	0.092
2018	5	31	2	29	24	20.8993	-20.9335	-0.294	0.094
2018	5	31	2	31	58	20.9051	-20.9325	-0.294	0.098
2018	5	31	2	37	6	20.9161	-20.9304	-0.292	0.102
2018	5	31	2	39	39	20.9217	-20.9294	-0.29	0.106
2018	5	31	2	42	12	20.9274	-20.9281	-0.29	0.126
2018	5	31	2	44	46	20.9332	-20.9272	-0.29	0.146
2018	5	31	2	47	21	20.9389	-20.9262	-0.292	0.164
2018	5	31	2	52	26	20.9502	-20.9237	-0.295	0.18
2018	5	31	2	55	0	20.9561	-20.9228	-0.295	0.181
2018	5	31	2	57	35	20.9616	-20.9216	-0.292	0.195
2018	5	31	3	0	8	20.9672	-20.9204	-0.287	0.209
2018	5	31	3	7	48	20.9838	-20.9171	-0.272	0.225
2018	5	31	3	10	23	20.9897	-20.9162	-0.267	0.23
2018	5	31	3	12	56	20.9955	-20.915	-0.258	0.233
2018	5	31	3	15	29	21.0012	-20.914	-0.252	0.24
2018	5	31	3	18	3	21.007	-20.9129	-0.246	0.246
2018	5	31	3	20	38	21.0129	-20.9117	-0.248	0.254
2018	5	31	3	23	11	21.0188	-20.9105	-0.252	0.257
2018	5	31	3	28	18	21.0303	-20.9084	-0.259	0.256
2018	5	31	3	30	52	21.0361	-20.9072	-0.266	0.255
2018	5	31	3	33	26	21.0418	-20.9062	-0.27	0.256
2018	5	31	3	38	33	21.0527	-20.904	-0.277	0.273
2018	5	31	3	41	7	21.0583	-20.9027	-0.277	0.284
2018	5	31	3	43	41	21.0639	-20.9016	-0.273	0.298
2018	5	31	3	46	15	21.0698	-20.9007	-0.271	0.31
2018	5	31	3	48	48	21.0758	-20.8996	-0.264	0.33
2018	5	31	3	51	22	21.0816	-20.8983	-0.255	0.354
2018	5	31	3	56	29	21.0933	-20.8962	-0.25	0.375
2018	5	31	3	59	3	21.0991	-20.895	-0.242	0.382
2018	5	31	4	1	37	21.1048	-20.8938	-0.239	0.393
2018	5	31	4	6	42	21.116	-20.8916	-0.233	0.398
2018	5	31	4	9	15	21.1215	-20.8907	-0.232	0.391
2018	5	31	4	11	49	21.127	-20.8895	-0.23	0.381
2018	5	31	4	16	57	21.1379	-20.8876	-0.227	0.369
2018	5	31	4	19	29	21.143	-20.8865	-0.233	0.359
2018	5	31	4	22	3	21.1481	-20.8855	-0.235	0.344
2018	5	31	4	27	12	21.1586	-20.8836	-0.234	0.33
2018	5	31	4	32	17	21.169	-20.8814	-0.243	0.313
2018	5	31	4	34	52	21.1744	-20.8803	-0.243	0.304
2018	5	31	4	37	26	21.1797	-20.8793	-0.25	0.292
2018	5	31	4	39	59	21.185	-20.8784	-0.252	0.276
2018	5	31	4	42	32	21.1904	-20.8774	-0.256	0.253
2018	5	31	4	45	7	21.1955	-20.8764	-0.261	0.238
2018	5	31	4	47	41	21.2007	-20.8753	-0.267	0.216
2018	5	31	4	50	14	21.206	-20.8743	-0.273	0.211
2018	5	31	4	52	47	21.2111	-20.8735	-0.279	0.196
2018	5	31	4	55	22	21.2163	-20.8723	-0.286	0.183
2018	5	31	4	57	56	21.2213	-20.8714	-0.291	0.168
2018	5	31	5	3	2	21.2313	-20.869	-0.297	0.149
2018	5	31	5	5	36	21.2364	-20.8677	-0.297	0.147
2018	5	31	5	8	11	21.2417	-20.8664	-0.299	0.144
2018	5	31	5	10	43	21.2468	-20.8653	-0.298	0.134
2018	5	31	5	13	16	21.2519	-20.864	-0.296	0.123
2018	5	31	5	15	51	21.2569	-20.8627	-0.295	0.11
2018	5	31	5	18	25	21.2617	-20.8616	-0.295	0.1
2018	5	31	5	23	33	21.2718	-20.8589	-0.299	0.102
2018	5	31	5	26	6	21.2769	-20.8577	-0.303	0.1
2018	5	31	5	28	41	21.282	-20.8563	-0.306	0.1
2018	5	31	5	33	48	21.2924	-20.8535	-0.302	0.107
2018	5	31	5	36	20	21.2978	-20.8524	-0.301	0.125
2018	5	31	5	38	55	21.3026	-20.8512	-0.288	0.141
2018	5	31	5	41	30	21.3077	-20.8496	-0.282	0.145
2018	5	31	5	44	2	21.3132	-20.8485	-0.275	0.153
2018	5	31	5	46	36	21.3185	-20.8471	-0.265	0.157
2018	5	31	5	49	9	21.324	-20.8457	-0.26	0.161
2018	5	31	5	51	44	21.3294	-20.8445	-0.26	0.164
2018	5	31	5	54	18	21.3348	-20.8431	-0.257	0.17
2018	5	31	5	59	24	21.3452	-20.8405	-0.256	0.172
2018	5	31	6	1	59	21.3502	-20.839	-0.254	0.17
2018	5	31	6	4	33	21.3556	-20.8377	-0.253	0.166
2018	5	31	6	9	39	21.3666	-20.8352	-0.259	0.17
2018	5	31	6	14	47	21.3773	-20.8324	-0.275	0.158
2018	5	31	6	17	20	21.3826	-20.8311	-0.285	0.154
2018	5	31	6	19	54	21.3879	-20.8295	-0.299	0.146
2018	5	31	6	22	28	21.3934	-20.8282	-0.312	0.145
2018	5	31	6	25	3	21.3988	-20.827	-0.32	0.146
2018	5	31	6	27	38	21.4041	-20.8255	-0.315	0.149
2018	5	31	6	30	12	21.4095	-20.8241	-0.311	0.147
2018	5	31	6	32	47	21.4149	-20.8229	-0.306	0.149
2018	5	31	6	35	22	21.4203	-20.8216	-0.301	0.151
2018	5	31	6	37	57	21.4257	-20.8202	-0.298	0.155
2018	5	31	6	40	31	21.431	-20.819	-0.294	0.158
2018	5	31	6	43	6	21.4362	-20.8173	-0.287	0.154
2018	5	31	6	45	41	21.4415	-20.8159	-0.279	0.153
2018	5	31	6	48	16	21.4471	-20.8146	-0.276	0.154
2018	5	31	6	50	50	21.4527	-20.8133	-0.271	0.157
2018	5	31	6	53	25	21.4581	-20.8121	-0.267	0.16
2018	5	31	6	56	0	21.4632	-20.8107	-0.26	0.163
2018	5	31	6	58	35	21.4682	-20.8093	-0.251	0.163
2018	5	31	7	1	10	21.4731	-20.808	-0.24	0.165
2018	5	31	7	3	44	21.4784	-20.8066	-0.236	0.176
2018	5	31	7	6	19	21.4839	-20.8055	-0.234	0.183
2018	5	31	7	8	54	21.4892	-20.8042	-0.229	0.184
2018	5	31	7	11	29	21.4943	-20.8031	-0.228	0.185
2018	5	31	7	14	3	21.4994	-20.8014	-0.222	0.187
2018	5	31	7	16	38	21.5049	-20.7999	-0.22	0.19
2018	5	31	7	19	13	21.5103	-20.7986	-0.217	0.194
2018	5	31	7	21	48	21.5154	-20.7974	-0.216	0.197
2018	5	31	7	24	22	21.5207	-20.7961	-0.21	0.196
2018	5	31	7	26	57	21.5262	-20.7948	-0.205	0.199
2018	5	31	7	29	32	21.5316	-20.7933	-0.2	0.204
2018	5	31	7	32	7	21.5369	-20.792	-0.196	0.207
2018	5	31	7	34	41	21.5423	-20.7907	-0.192	0.21
2018	5	31	7	37	16	21.5476	-20.7894	-0.186	0.214
2018	5	31	7	39	51	21.5528	-20.788	-0.179	0.218
2018	5	31	7	42	26	21.5578	-20.7866	-0.177	0.219
2018	5	31	7	45	0	21.563	-20.7855	-0.174	0.221
2018	5	31	7	47	35	21.5682	-20.7842	-0.17	0.218
2018	5	31	7	50	10	21.5735	-20.7828	-0.166	0.216
2018	5	31	7	52	45	21.5786	-20.7814	-0.161	0.218
2018	5	31	7	55	20	21.5837	-20.7802	-0.159	0.219
2018	5	31	7	57	54	21.589	-20.7789	-0.156	0.222
2018	5	31	8	0	29	21.5943	-20.7774	-0.15	0.224
2018	5	31	8	3	4	21.5997	-20.7762	-0.144	0.226
2018	5	31	8	5	39	21.6047	-20.7751	-0.139	0.229
2018	5	31	8	8	13	21.6099	-20.7735	-0.13	0.235
2018	5	31	8	10	48	21.6153	-20.7721	-0.122	0.244
2018	5	31	8	13	23	21.6207	-20.7708	-0.114	0.25
2018	5	31	8	15	58	21.6261	-20.7695	-0.106	0.258
2018	5	31	8	18	32	21.6315	-20.7683	-0.101	0.261
2018	5	31	8	21	7	21.6365	-20.767	-0.098	0.264
2018	5	31	8	23	42	21.6418	-20.7655	-0.091	0.267
2018	5	31	8	26	17	21.6473	-20.7641	-0.086	0.272
2018	5	31	8	28	51	21.6527	-20.7627	-0.086	0.275
2018	5	31	8	31	26	21.6582	-20.7614	-0.086	0.276
2018	5	31	8	34	1	21.6637	-20.76	-0.086	0.277
2018	5	31	8	36	36	21.6688	-20.7588	-0.083	0.275
2018	5	31	8	39	10	21.674	-20.7574	-0.077	0.277
2018	5	31	8	41	45	21.6793	-20.7561	-0.076	0.278
2018	5	31	8	44	20	21.6848	-20.7548	-0.072	0.279
2018	5	31	8	46	55	21.6901	-20.7533	-0.065	0.279
2018	5	31	8	49	29	21.6954	-20.7519	-0.057	0.281
2018	5	31	8	52	4	21.7006	-20.7507	-0.052	0.285
2018	5	31	8	54	39	21.7055	-20.7495	-0.042	0.28
2018	5	31	8	57	14	21.7105	-20.7481	-0.037	0.278
2018	5	31	8	59	48	21.7155	-20.747	-0.032	0.275
2018	5	31	9	2	23	21.7204	-20.7456	-0.024	0.274
2018	5	31	9	4	58	21.7257	-20.7442	-0.018	0.275
2018	5	31	9	7	33	21.7312	-20.7429	-0.017	0.278
2018	5	31	9	10	7	21.7365	-20.7417	-0.017	0.278
2018	5	31	9	12	42	21.7416	-20.7402	-0.012	0.276
2018	5	31	9	15	17	21.7472	-20.7388	-0.013	0.278
2018	5	31	9	17	52	21.7528	-20.7373	-0.012	0.277
2018	5	31	9	20	26	21.7584	-20.7361	-0.011	0.276
2018	5	31	9	23	1	21.7638	-20.7348	-0.014	0.276
2018	5	31	9	25	36	21.769	-20.7334	-0.013	0.275
2018	5	31	9	28	11	21.7742	-20.732	-0.01	0.268
2018	5	31	9	30	45	21.7794	-20.7308	-0.01	0.258
2018	5	31	9	33	20	21.7845	-20.7294	-0.011	0.25
2018	5	31	9	35	55	21.7894	-20.7283	-0.011	0.241
2018	5	31	9	38	30	21.7943	-20.7268	-0.01	0.231
2018	5	31	9	41	4	21.7992	-20.7257	-0.012	0.222
2018	5	31	9	43	39	21.8044	-20.7246	-0.013	0.212
2018	5	31	9	46	14	21.8096	-20.7232	-0.014	0.2
2018	5	31	9	48	49	21.8148	-20.7217	-0.016	0.195
2018	5	31	9	51	23	21.8198	-20.7207	-0.015	0.193
2018	5	31	9	53	58	21.8248	-20.7192	-0.017	0.191
2018	5	31	9	56	33	21.8299	-20.7179	-0.015	0.189
2018	5	31	9	59	8	21.8351	-20.7166	-0.018	0.193
2018	5	31	10	1	42	21.8402	-20.7154	-0.013	0.197
2018	5	31	10	4	17	21.8454	-20.7139	-0.009	0.201
2018	5	31	10	6	52	21.8508	-20.7127	-0.007	0.203
2018	5	31	10	9	27	21.856	-20.7113	-0.005	0.202
2018	5	31	10	12	1	21.8612	-20.7099	0.001	0.204
2018	5	31	10	14	36	21.8666	-20.7086	0.007	0.204
2018	5	31	10	17	11	21.872	-20.7074	0.01	0.205
2018	5	31	10	19	46	21.8772	-20.7062	0.018	0.204
2018	5	31	10	22	21	21.8824	-20.7047	0.021	0.201
2018	5	31	10	24	55	21.8876	-20.7033	0.027	0.196
2018	5	31	10	27	30	21.8926	-20.7021	0.033	0.195
2018	5	31	10	30	5	21.8975	-20.7008	0.041	0.196
2018	5	31	10	32	40	21.9026	-20.6993	0.046	0.193
2018	5	31	10	35	14	21.9078	-20.6982	0.051	0.195
2018	5	31	10	37	49	21.9131	-20.6971	0.058	0.197
2018	5	31	10	40	24	21.9183	-20.6955	0.063	0.198
2018	5	31	10	42	59	21.9234	-20.6942	0.07	0.2
2018	5	31	10	45	33	21.9288	-20.693	0.073	0.203
2018	5	31	10	48	8	21.934	-20.6916	0.078	0.204
2018	5	31	10	50	43	21.9391	-20.6905	0.081	0.201
2018	5	31	10	53	18	21.9442	-20.689	0.085	0.199
2018	5	31	10	55	52	21.9492	-20.6877	0.091	0.193
2018	5	31	10	58	27	21.9544	-20.6864	0.094	0.184
2018	5	31	11	1	2	21.9597	-20.685	0.095	0.176
2018	5	31	11	3	37	21.9648	-20.6839	0.093	0.165
2018	5	31	11	6	12	21.9698	-20.6825	0.093	0.154
2018	5	31	11	8	46	21.9748	-20.6812	0.091	0.145
2018	5	31	11	11	21	21.9799	-20.6799	0.085	0.14
2018	5	31	11	13	56	21.985	-20.6787	0.079	0.134
2018	5	31	11	16	31	21.9901	-20.6774	0.071	0.13
2018	5	31	11	19	5	21.9953	-20.6761	0.065	0.129
2018	5	31	11	21	40	22.0003	-20.6749	0.058	0.128
2018	5	31	11	24	15	22.0055	-20.6735	0.058	0.131
2018	5	31	11	26	50	22.0106	-20.6722	0.056	0.136
2018	5	31	11	29	24	22.0157	-20.6709	0.056	0.139
2018	5	31	11	31	59	22.0209	-20.6695	0.059	0.141
2018	5	31	11	34	34	22.0261	-20.6681	0.064	0.143
2018	5	31	11	37	9	22.0311	-20.6671	0.07	0.143
2018	5	31	11	39	43	22.0362	-20.6656	0.077	0.14
2018	5	31	11	42	18	22.0415	-20.6642	0.083	0.14
2018	5	31	11	44	53	22.0468	-20.663	0.089	0.136
2018	5	31	11	47	28	22.0522	-20.6617	0.095	0.125
2018	5	31	11	50	3	22.0573	-20.6603	0.1	0.111
2018	5	31	11	52	37	22.0626	-20.659	0.107	0.095
2018	5	31	11	55	12	22.0677	-20.6577	0.111	0.077
2018	5	31	11	57	47	22.0728	-20.6564	0.118	0.063
2018	5	31	12	0	22	22.078	-20.655	0.124	0.048
2018	5	31	12	2	56	22.083	-20.6538	0.131	0.033
2018	5	31	12	5	31	22.0882	-20.6526	0.137	0.023
2018	5	31	12	8	6	22.0933	-20.6513	0.142	0.015
2018	5	31	12	10	41	22.098	-20.6501	0.147	0.011
2018	5	31	12	13	15	22.103	-20.6487	0.148	0.008
2018	5	31	12	15	50	22.1077	-20.6477	0.151	0.008
2018	5	31	12	18	25	22.1125	-20.6464	0.152	0.008
2018	5	31	12	21	0	22.1177	-20.6451	0.147	0.01
2018	5	31	12	23	34	22.1229	-20.6439	0.139	0.013
2018	5	31	12	26	9	22.1283	-20.6425	0.129	0.009
2018	5	31	12	28	44	22.1335	-20.6411	0.123	0.009
2018	5	31	12	31	19	22.1389	-20.6397	0.11	0.011
2018	5	31	12	33	53	22.1441	-20.6385	0.099	0.011
2018	5	31	12	36	28	22.1494	-20.637	0.086	0.01
2018	5	31	12	39	3	22.1548	-20.6356	0.071	0.009
2018	5	31	12	41	38	22.1601	-20.6344	0.059	0.007
2018	5	31	12	44	12	22.1649	-20.6332	0.048	0.002
2018	5	31	12	46	47	22.17	-20.6317	0.04	0
2018	5	31	12	49	22	22.1751	-20.6305	0.026	-0.002
2018	5	31	12	51	57	22.1803	-20.6293	0.016	-0.002
2018	5	31	12	54	31	22.1856	-20.6277	0.011	0
2018	5	31	12	57	6	22.1909	-20.6265	0.006	0.003
2018	5	31	12	59	41	22.1961	-20.625	0.005	0.006
2018	5	31	13	2	16	22.2014	-20.6239	0.006	0.01
2018	5	31	13	4	50	22.2068	-20.6226	0.009	0.015
2018	5	31	13	7	25	22.2122	-20.6211	0.01	0.021
2018	5	31	13	10	0	22.2176	-20.6197	0.016	0.031
2018	5	31	13	12	35	22.2231	-20.6184	0.018	0.04
2018	5	31	13	15	9	22.2283	-20.617	0.021	0.047
2018	5	31	13	17	44	22.2334	-20.6156	0.024	0.052
2018	5	31	13	20	19	22.2387	-20.6141	0.026	0.057
2018	5	31	13	22	54	22.2441	-20.613	0.025	0.065
2018	5	31	13	25	28	22.2494	-20.6118	0.024	0.074
2018	5	31	13	28	3	22.2546	-20.6102	0.025	0.082
2018	5	31	13	30	38	22.2599	-20.609	0.021	0.085
2018	5	31	13	33	13	22.2652	-20.6076	0.021	0.089
2018	5	31	13	35	47	22.2706	-20.6062	0.017	0.093
2018	5	31	13	38	22	22.2762	-20.6049	0.011	0.103
2018	5	31	13	40	57	22.2816	-20.6034	0.008	0.111
2018	5	31	13	43	32	22.287	-20.602	0.008	0.113
2018	5	31	13	46	7	22.2922	-20.6008	0.01	0.116
2018	5	31	13	48	41	22.2978	-20.5993	0.014	0.117
2018	5	31	13	51	16	22.3033	-20.5979	0.02	0.118
2018	5	31	13	53	51	22.3088	-20.5966	0.028	0.119
2018	5	31	13	56	26	22.3144	-20.5951	0.038	0.12
2018	5	31	13	59	0	22.3199	-20.5937	0.047	0.116
2018	5	31	14	1	35	22.3255	-20.5922	0.055	0.117
2018	5	31	14	4	10	22.3312	-20.591	0.061	0.115
2018	5	31	14	6	45	22.3367	-20.5896	0.068	0.108
2018	5	31	14	9	19	22.3423	-20.588	0.07	0.103
2018	5	31	14	11	54	22.3478	-20.5866	0.079	0.097
2018	5	31	14	14	29	22.3532	-20.5853	0.088	0.09
2018	5	31	14	17	4	22.3586	-20.5838	0.1	0.09
2018	5	31	14	19	38	22.3639	-20.5825	0.113	0.088
2018	5	31	14	22	13	22.3693	-20.5812	0.121	0.085
2018	5	31	14	24	48	22.3748	-20.5798	0.124	0.086
2018	5	31	14	27	23	22.3804	-20.5786	0.119	0.087
2018	5	31	14	29	57	22.386	-20.577	0.109	0.086
2018	5	31	14	32	32	22.3915	-20.5756	0.088	0.087
2018	5	31	14	35	7	22.397	-20.5742	0.06	0.089
